# Supplementary material for: A gene prioritization method based on a swine multi-omics knowledgebase and a deep learning model
Source: PubMed Central journal article supplement (PMC7483748; doi:10.1038/s42003-020-01233-4), 2020-09-10
Supplement: 42003_2020_1233_MOESM1_ESM.pdf [file 42003_2020_1233_MOESM1_ESM.pdf]

# 1 Supplementary Figures

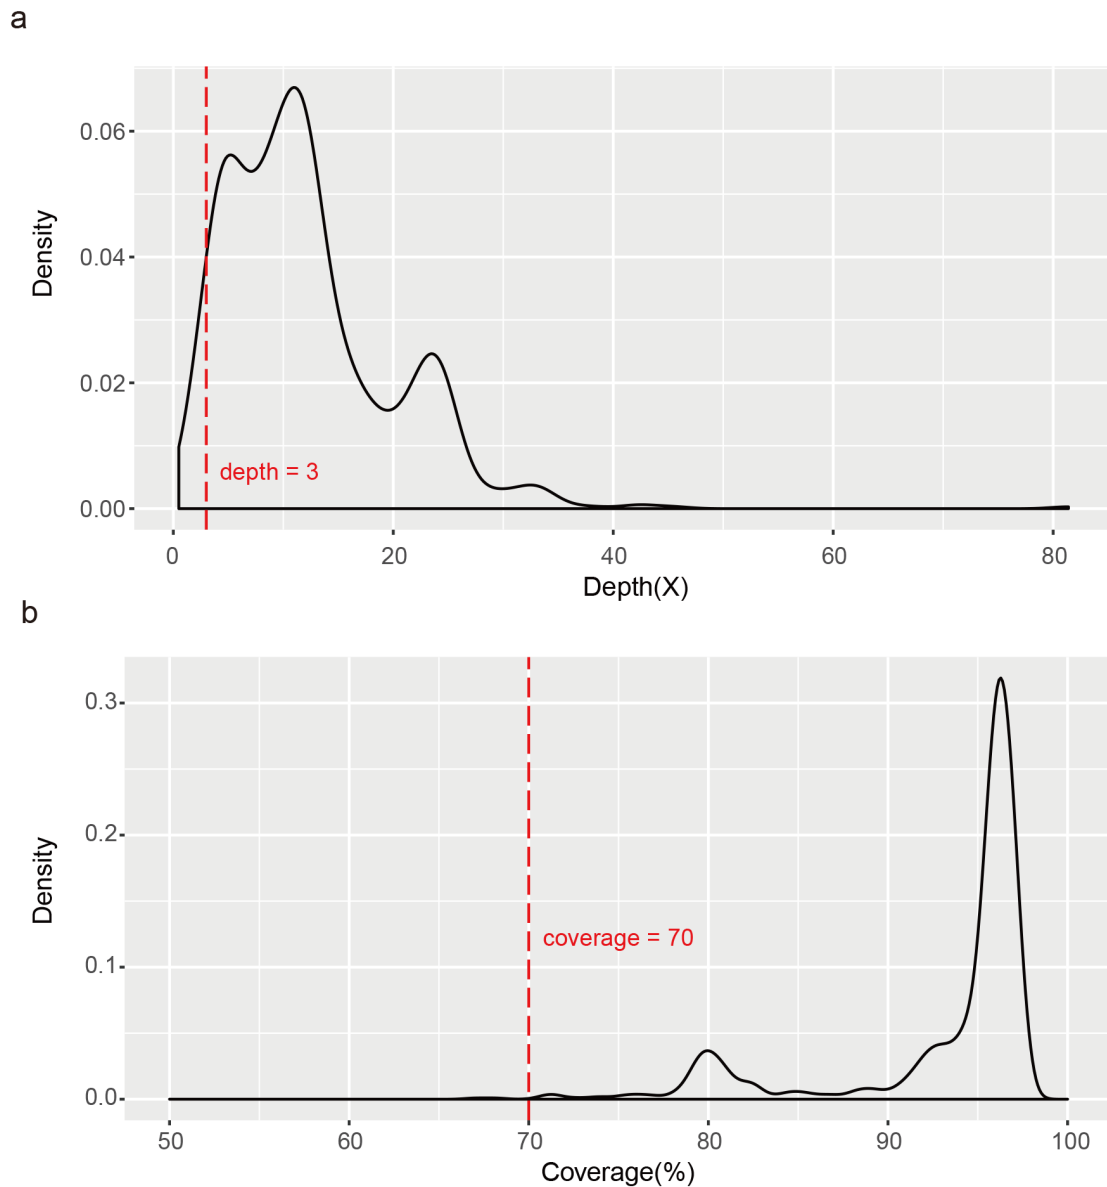

2  
3 **Supplementary Figure 1. Density distribution of sequencing depth and coverage in pig**  
4 **resequencing data.** a. Density distribution of sequencing depth in swine resequencing data. b.  
5 Density distribution of sequencing coverage in resequencing data. Most data have a sequencing  
6 depth >3 and sequencing coverage >70%, and these samples are used to construct the omics  
7 knowledgebase.

8

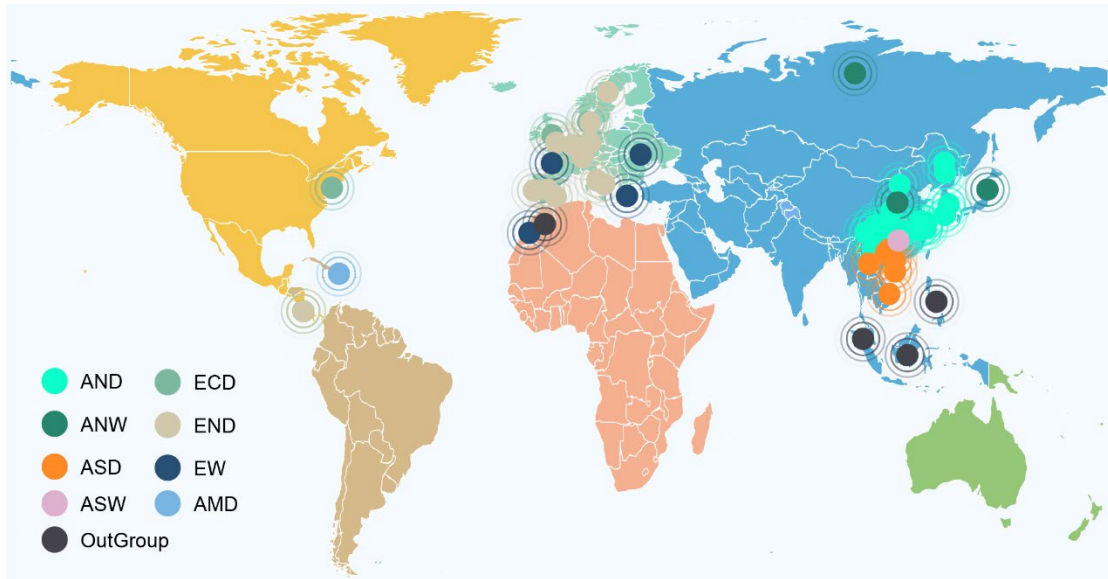

9  
10  
11  
12  
13  
14  
15  
16  
17  
18  
19  
20  
21  
22  
23  
24  
25  
26  
27  
28  
29  
30  
31

**Supplementary Figure 2. Geographical distribution of the pig resequencing samples in the world.** A total of 825 qualified individuals were retained for knowledgebase construction, which included 29 Asian native breeds, 20 European native breeds, three European commercial breeds, two American native breeds, and five other breeds (outgroup). AND: Asian northern domestic, ANW: Asian northern wild, ASD: Asian southern domestic, ASW: Asian southern wild, ECD: European commercial domestic, END: European native domestic, EW: European wild, AMD: America domestic, OutGroup: outgroup.

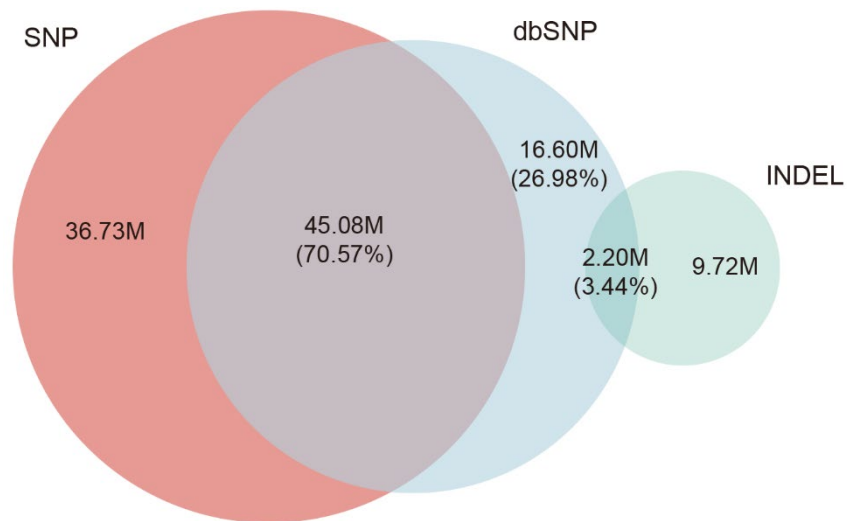

32  
 33  
 34  
 35  
 36  
 37  
 38  
 39  
 40  
 41  
 42  
 43  
 44  
 45  
 46  
 47  
 48  
 49  
 50  
 51  
 52  
 53

**Supplementary Figure 3. Venn diagrams that show the distribution of shared and unique variations between ISwine and dbSNP.** The dbSNP (Build 150) database from NCBI contains a great many pig variations and is a good reference to identify novel discovered variations. Our variant data set (both SNPs and indels) in ISwine covered >74.02% of its variants, and 46,451,715 variants were considered as novel.

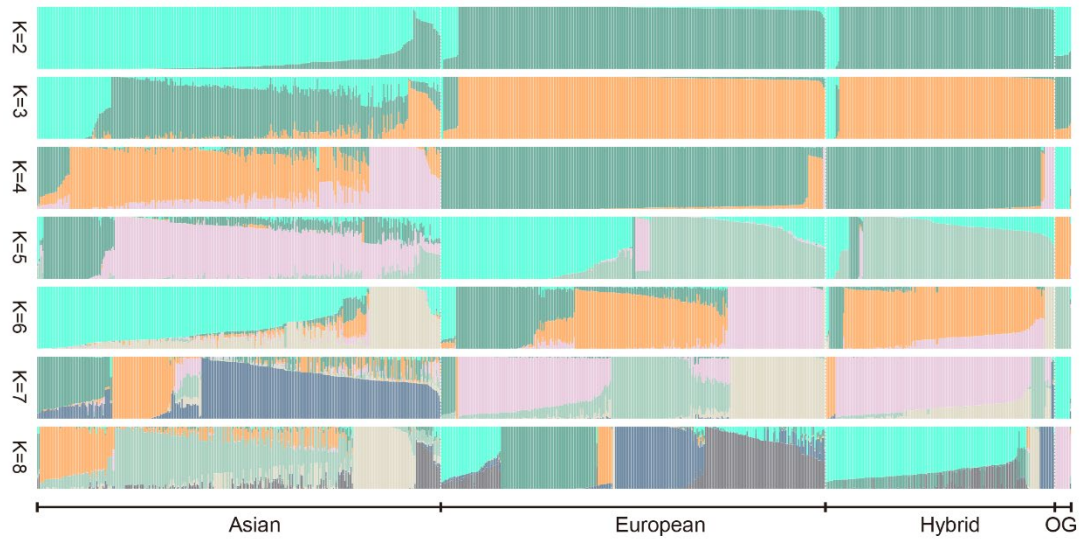

54

55 **Supplementary Figure 4. Genetic structure analysis for 825 sequenced individual pigs (*Sus***  
 56 ***scrofa*) using ADMIXTURE with K = 2 to 8.** Each individual was represented by a stacked column,  
 57 which was partitioned into 2 - 8 colored segments with the length of each segment representing the  
 58 proportion of the individual's genome from K = 2 - 8 ancestral populations. The first level of  
 59 clustering (K = 2) reflected the primary geographical isolation between Asia and Europe. At K = 4,  
 60 the outgroup (OG) became separated from Asian individuals.

61

62

63

64

65

66

67

68

69

70

71

72

73

74

75

76

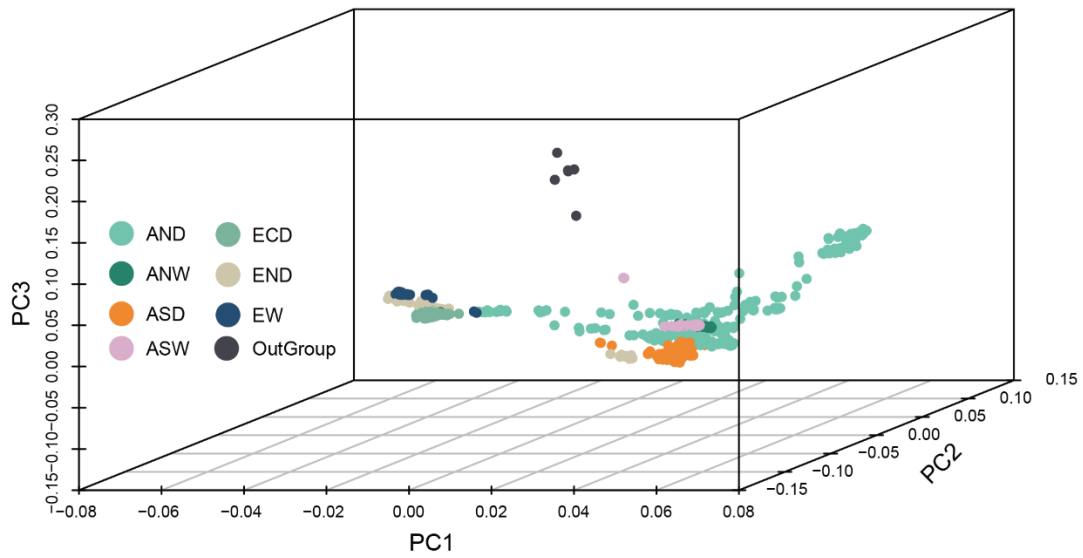

77

78 **Supplementary Figure 5. Principal Component Analysis of all pig resequencing samples.** The  
 79 top three principal components were derived from the SNP genotype data and used for plotting the  
 80 population structure. AND: Asian northern domestic, ANW: Asian northern wild, ASD: Asian  
 81 southern domestic, ASW: Asian southern wild, ECD: European commercial domestic, END:  
 82 European native domestic, EW: European wild, OutGroup: outgroup.

83

84

85

86

87

88

89

90

91

92

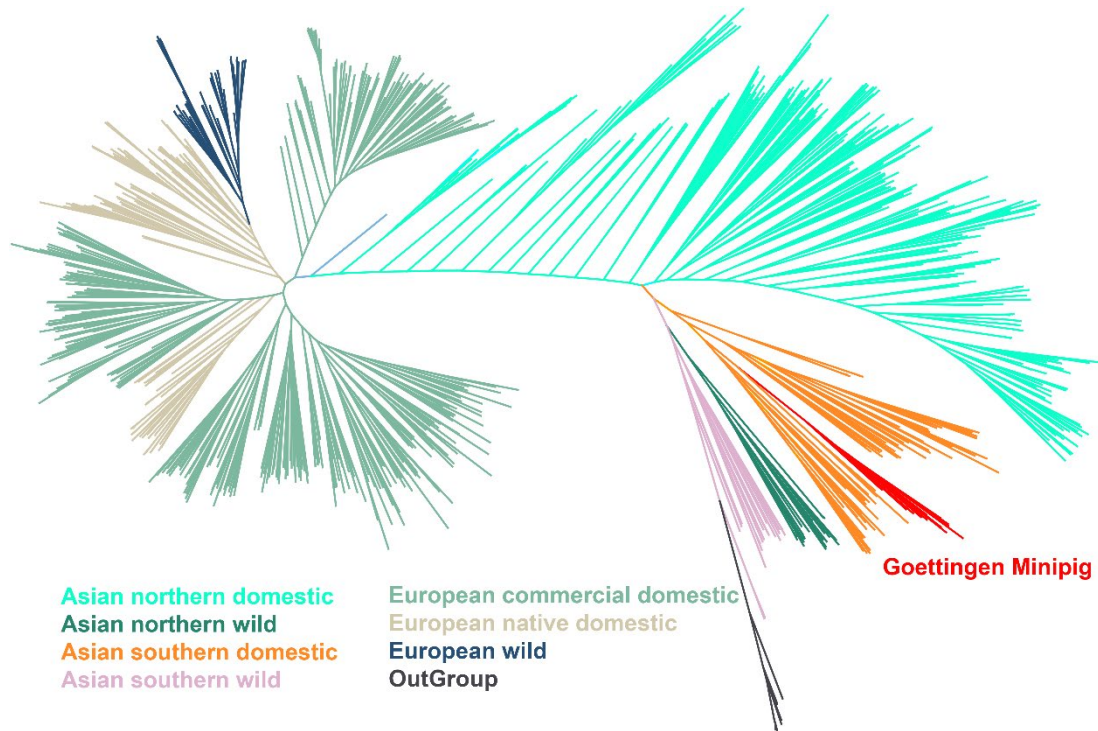

93

94 **Supplementary Figure 6. Analysis of the phylogenetic relationship of all pig resequencing**  
 95 **samples.** The Asian and European pigs defined their own separate clades, and each clade split into  
 96 a domesticated clade and a wild clade. The European Goettingen Minipig showed more genomic  
 97 similarity to Asian southern pigs than to European native breeds.

98

99

100

101

102

103

104

105

106

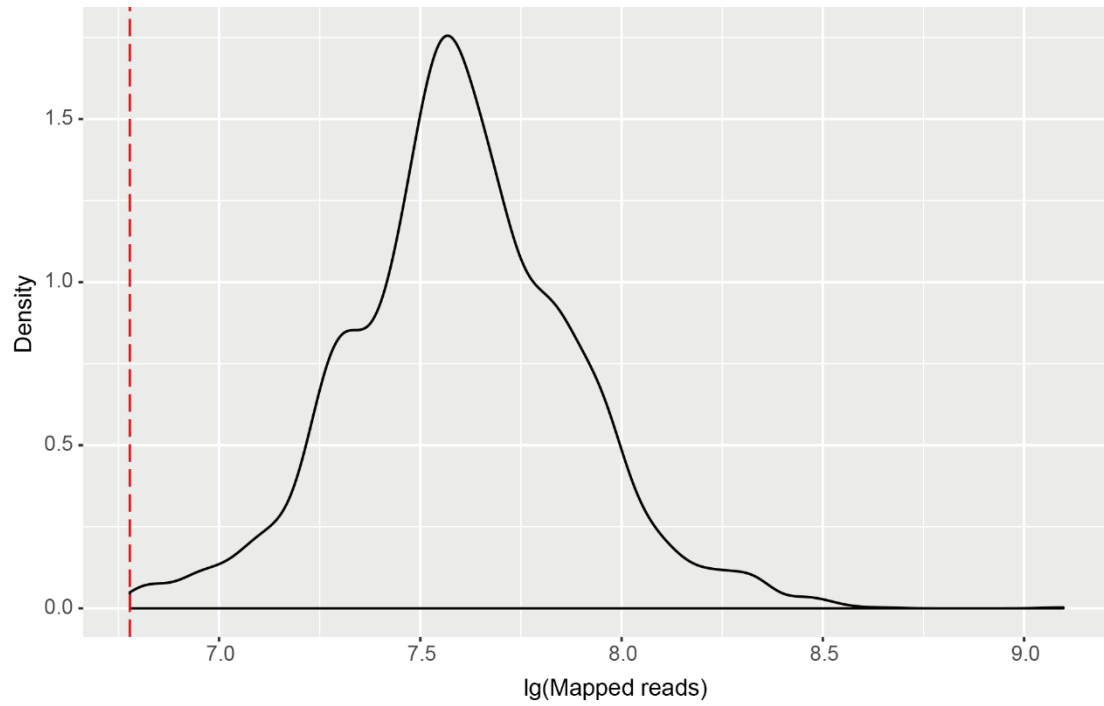

107

108 **Supplementary Figure 7. Density distribution of mapped read counts in pig RNA-seq samples.**

109 The x-axis represents the logarithm of the mapped reads, and although we retained individuals with  
110 mapped reads > 6MB (dotted line) for knowledgebase construction, the mapped reads of the vast

111 majority of samples were >10MB (7.0).

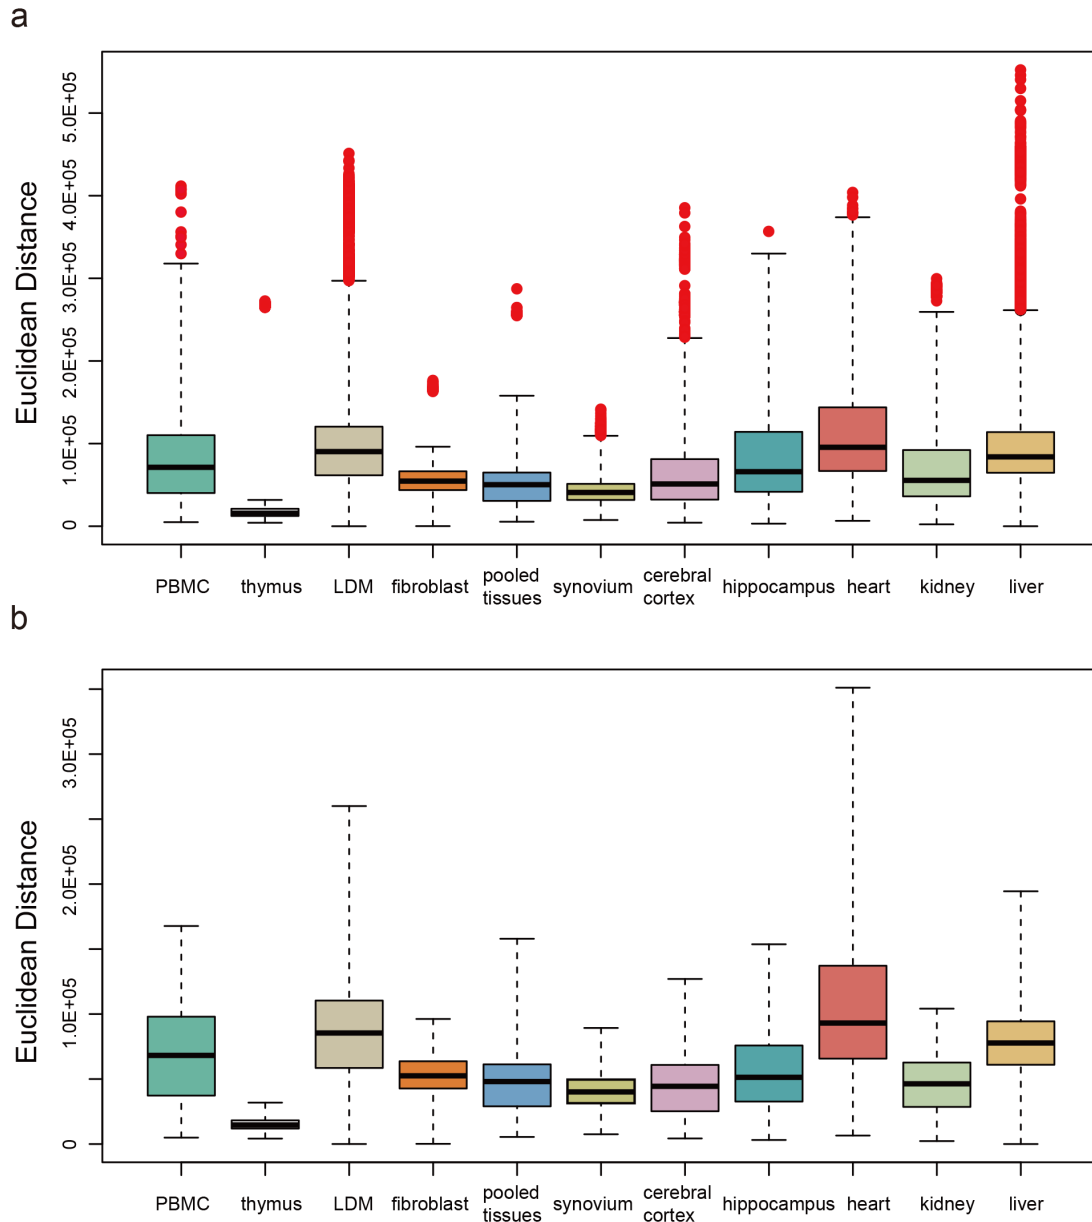

112

113

114

115

116

117

118

119

120

**Supplementary Figure 8. Detection of discrete samples in various tissues of pigs.** a. Euclidean Distance of the samples before removing the discrete samples. b. Euclidean Distance of the samples after removing the discrete samples. PBMC, Peripheral blood mononuclear cell; LDM, Longissimus Dorsi Muscle. The boxes denote the interquartile range (IQR) between the first and third quartiles, and the line inside denote the median. The whiskers denote the lowest and highest values within 3 times IQR from the first and third quartiles, respectively. Outliers beyond the whiskers are shown as red dots.



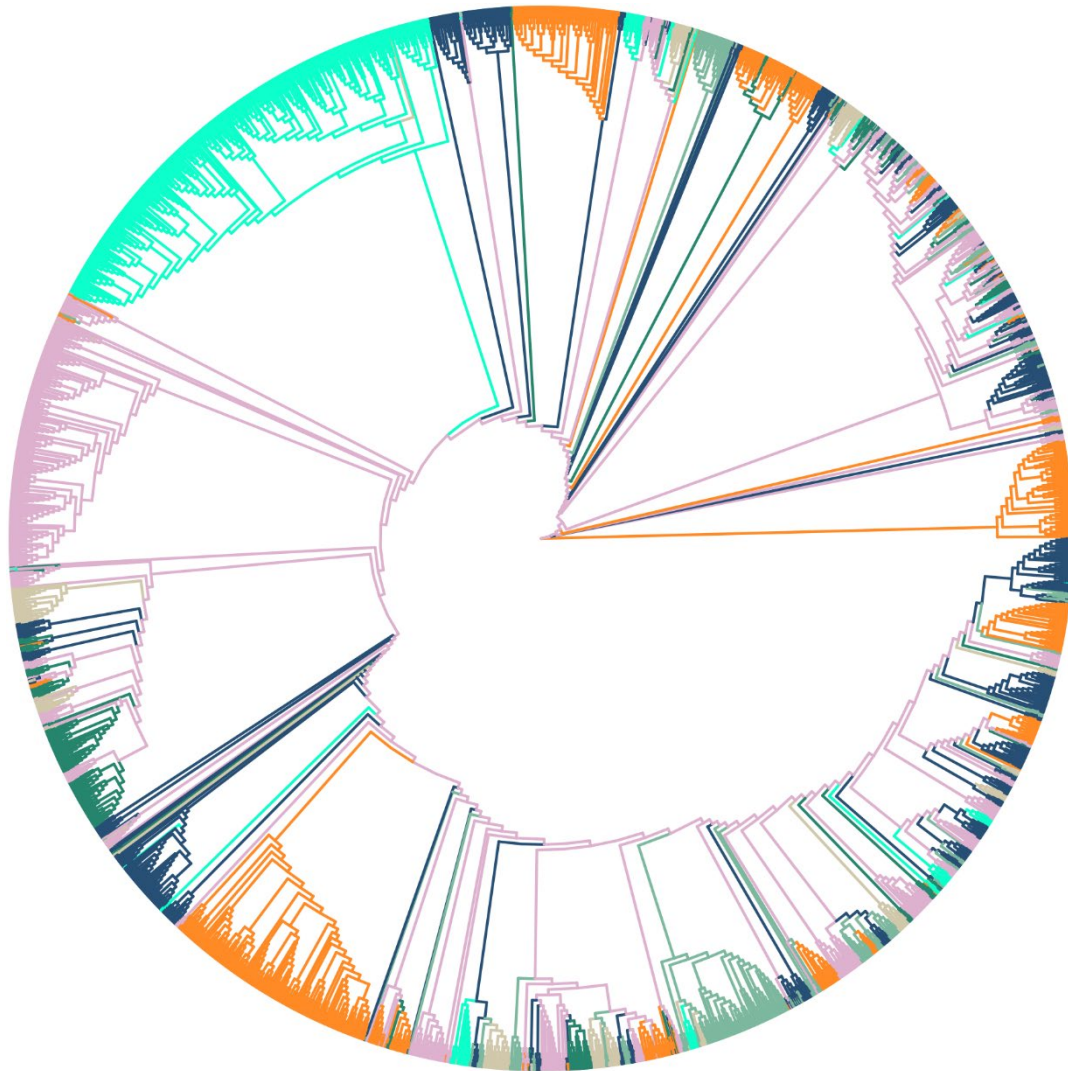

— fat — immunity — muscle — others — perception — reproduction — viscera

121  
122  
123  
124  
125  
126  
127  
128  
129  
130

**Supplementary Figure 9. Cluster analysis of pig RNA-seq samples in ISwine database.** Most samples were grouped together in the tissue classification, but a small number of samples were discrete. It may have been related to the temporal and spatial specificity of the tissues or the sample collection method.

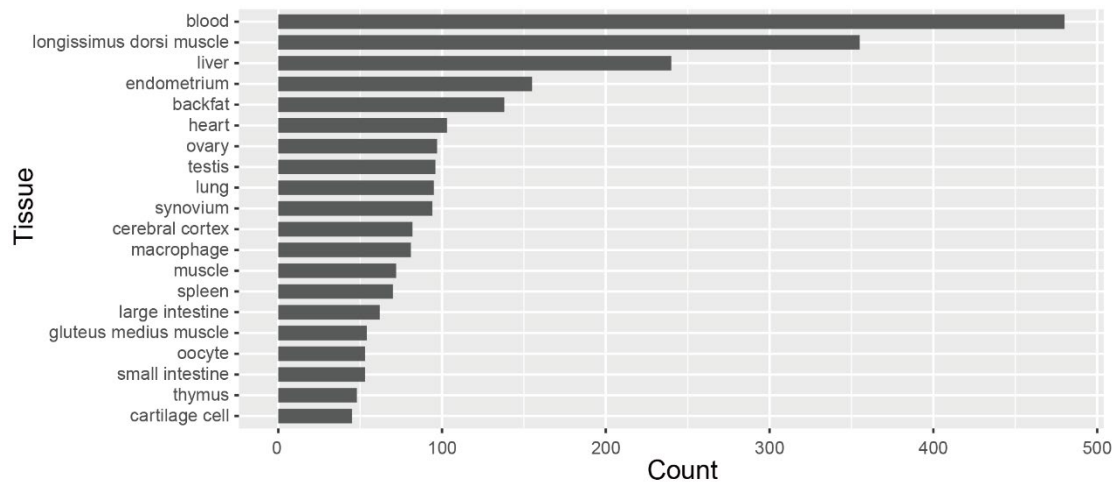

131  
 132  
 133  
 134  
 135  
 136  
 137  
 138  
 139  
 140  
 141  
 142  
 143  
 144  
 145  
 146  
 147  
 148  
 149  
 150  
 151  
 152  
 153  
 154  
 155  
 156  
 157

**Supplementary Figure 10. Top 20 tissues of pigs in ISwine database.** The x-axis represents the number of samples and the y-axis represents the tissues. The pig RNA-seq samples were mainly concentrated in the blood and longissimus dorsi muscle tissues. The liver, endometrium, back fat, and heart tissues also had a sample size >100.

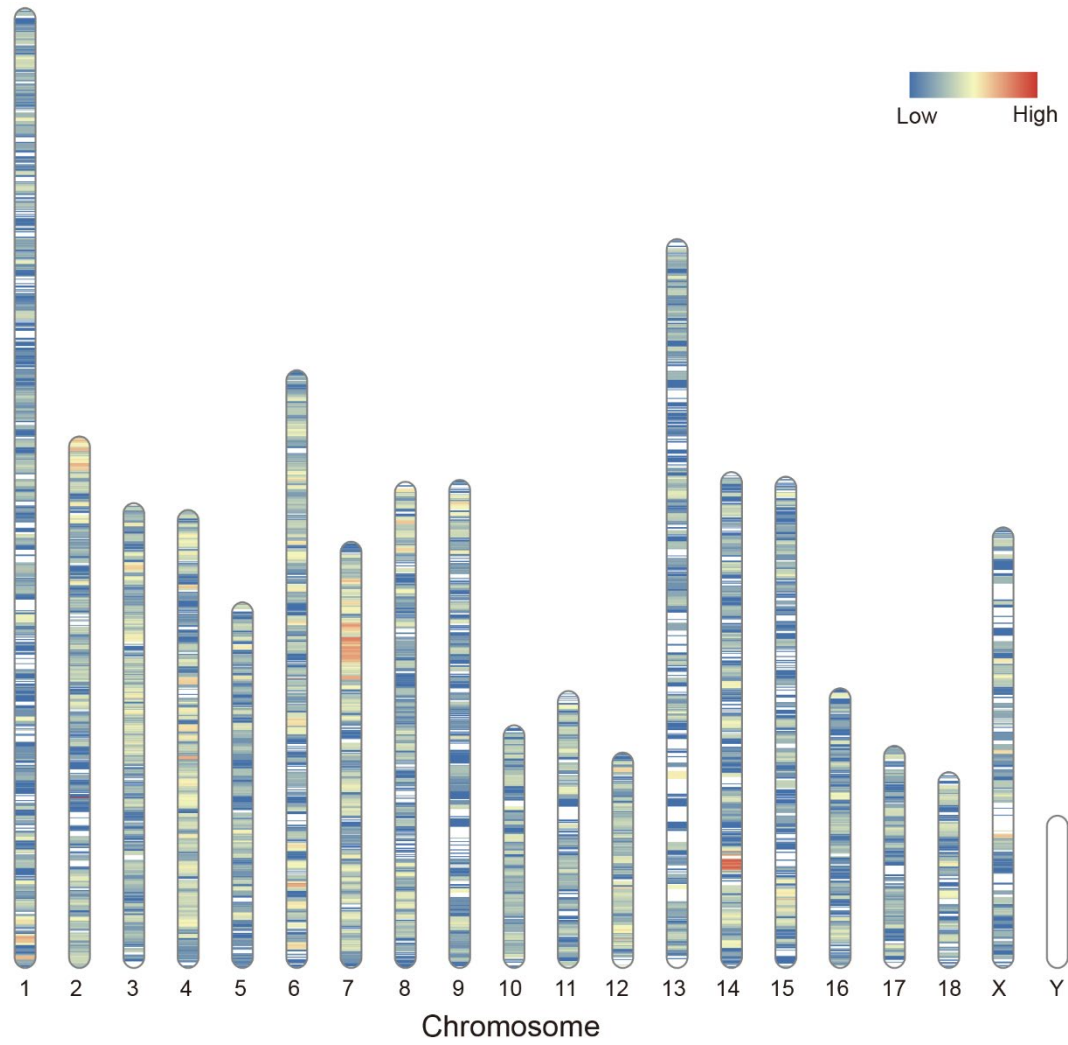

158

159 **Supplementary Figure 11. Distribution of pig QTXs on whole genome chromosomes.** The blue-  
 160 blue-yellow-red colors represent low-medium-high density of QTXs, respectively, and the blank region  
 161 represents where no QTXs exist. The pig QTXs were distributed over the whole genome with the  
 162 exception of chromosome Y.

163

164

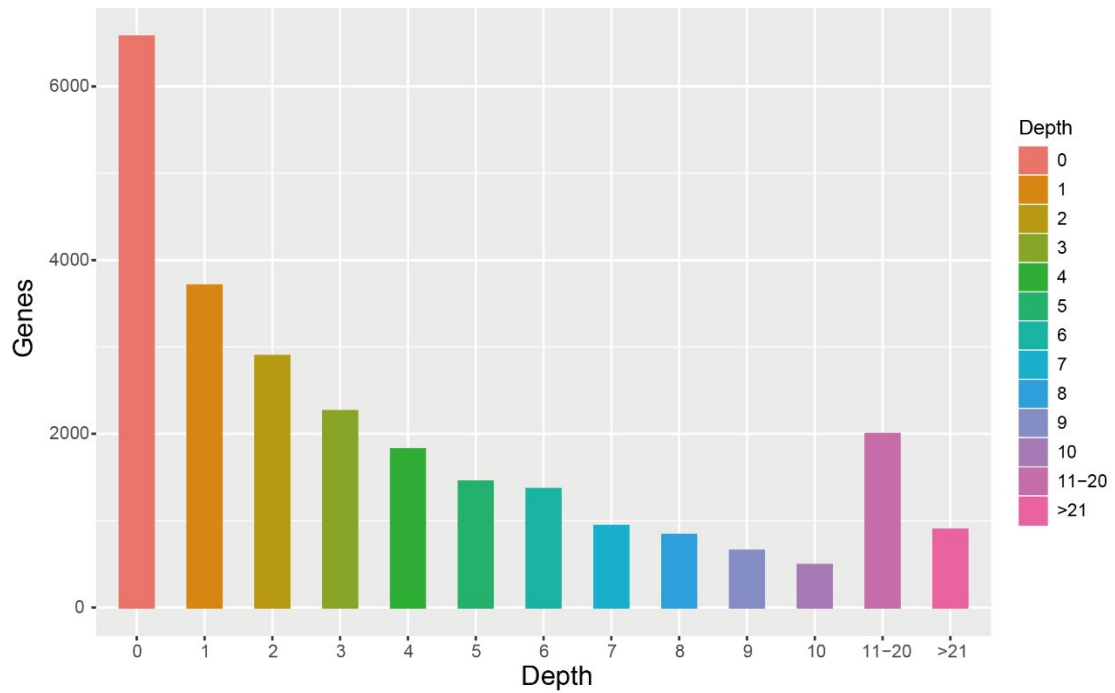

165  
 166  
 167  
 168  
 169  
 170  
 171  
 172  
 173  
 174  
 175  
 176  
 177  
 178  
 179  
 180  
 181  
 182  
 183  
 184

**Supplementary Figure 12. The statistics of depth of coverage of QTXs for all genes in the swine genome.** The x-axis represents the QTX depth, and the y-axis represents the number of genes. The QTXs covered 74.59% of the total genes, and most genes have low coverage of QTXs.

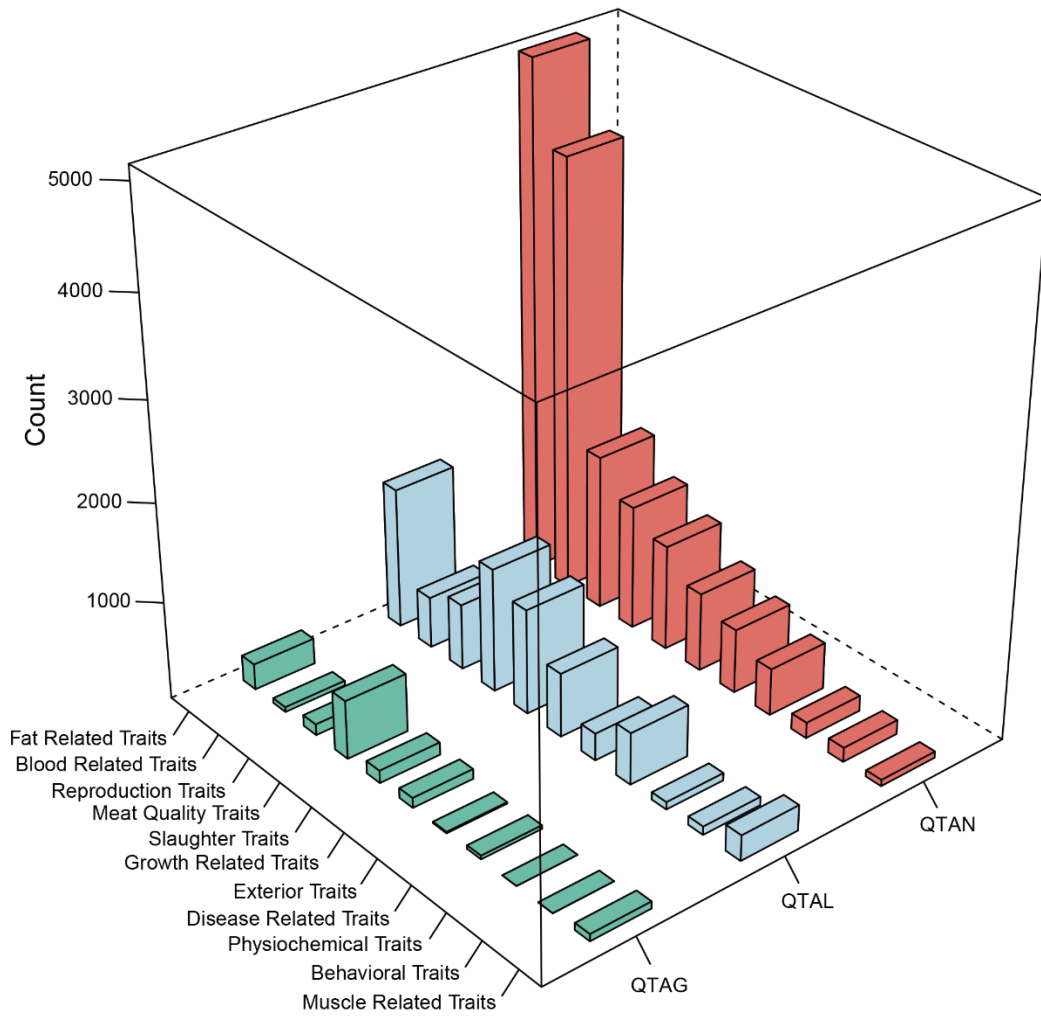

185

186 **Supplementary Figure 13. Histograms of QTAG, QTAN, and QTAL in 11 QTX categories.** The  
 187 x-axis represents the trait categories of QTX, the y-axis represents the type of QTX, and the z-axis  
 188 represents the number of QTXs. The relevant traits of 24,238 QTXs were divided into 11 major  
 189 categories, and these QTXs, especially QTANs, were concentrated mainly in the “Fat Related Traits”  
 190 and “Blood Related Traits” categories.

191

192

193

194

195

196

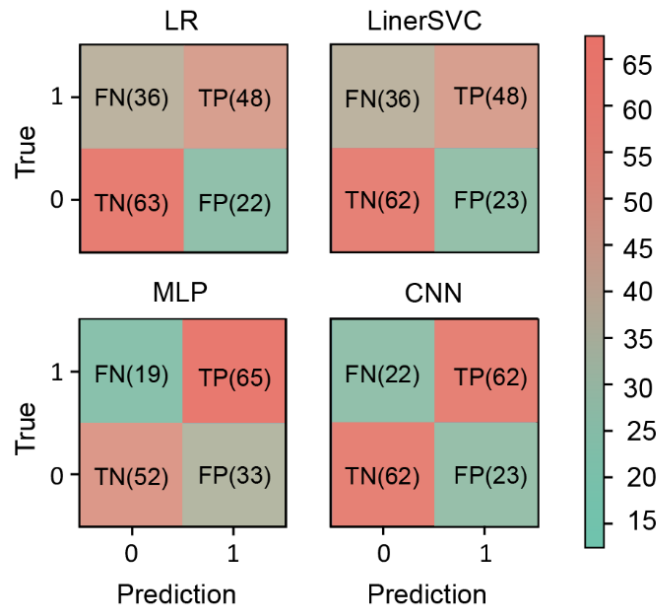

197  
 198  
 199  
 200  
 201  
 202  
 203  
 204  
 205  
 206  
 207  
 208  
 209  
 210  
 211  
 212  
 213  
 214  
 215  
 216  
 217  
 218  
 219  
 220  
 221  
 222  
 223  
 224  
 225

**Supplementary Figure 14. Confusion matrix of four models in construction of the gene prioritization model.** Each column of the matrix represents the instances in a predicted class, but each row represents the instances in an actual class. This makes it easy to see if the system is confusing two classes. LR: Logistic regression, LinearSVC: Linear Support Vector Classifier, MLP: Multi-Layer Perceptron, CNN: Convolutional Neural Networks, FN: False negative, TP: True positive, TN: True negative, FP: False positive.

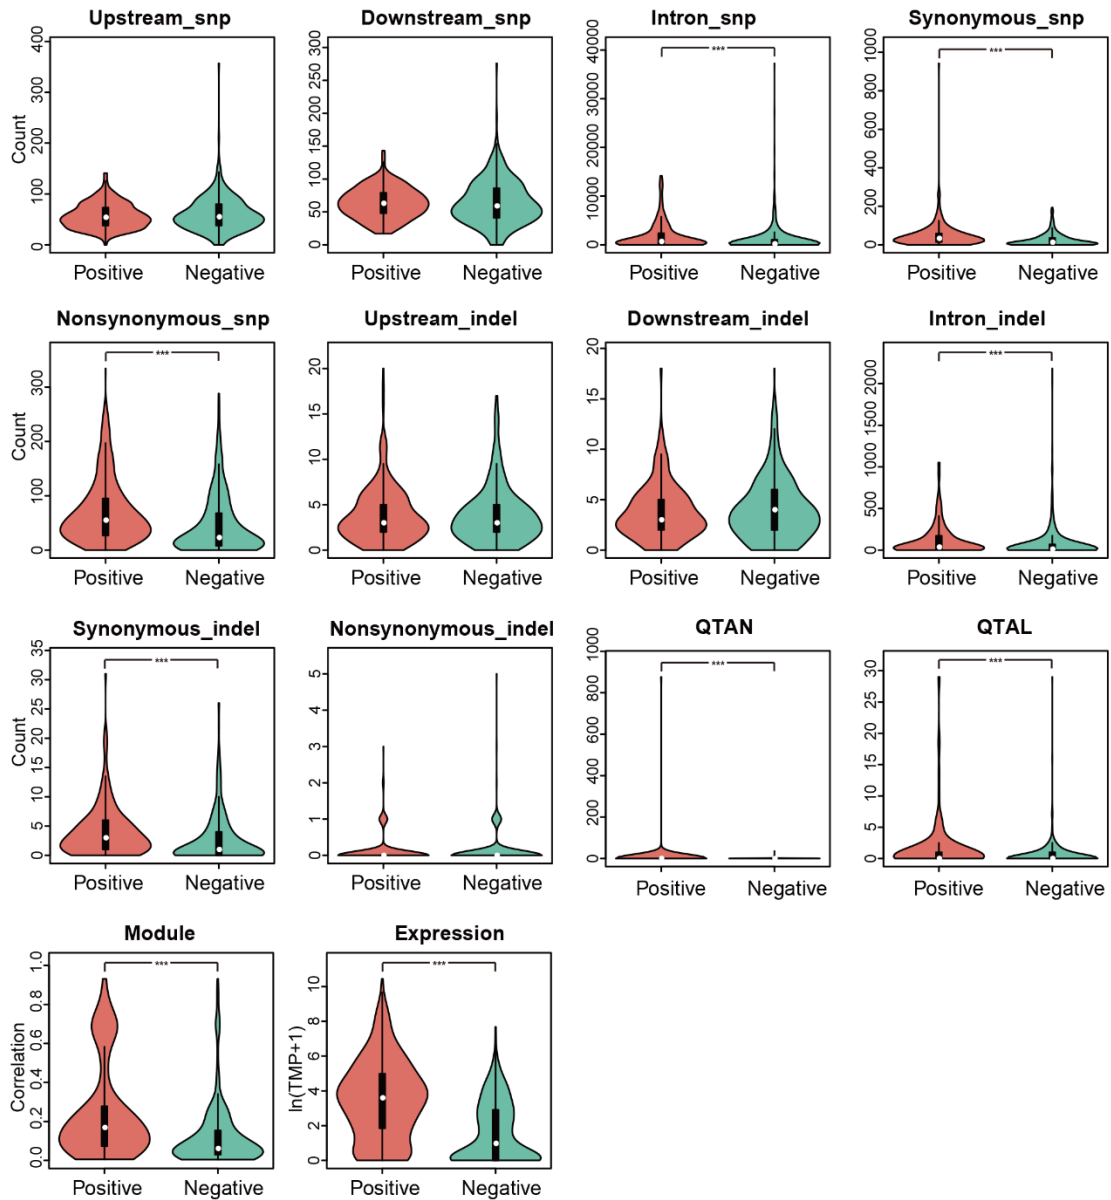

226

227 **Supplementary Figure 15. The comparison of 14 features in positive and negative samples.**

228 Nine of the 14 features showed significant differences between positive and negative samples. The

229 statistical significance was calculated by the Mann-Whitney test. \*\*\*:  $P < 0.01$ .

230

231

232

233

234

235

236

237

238

239

240

241

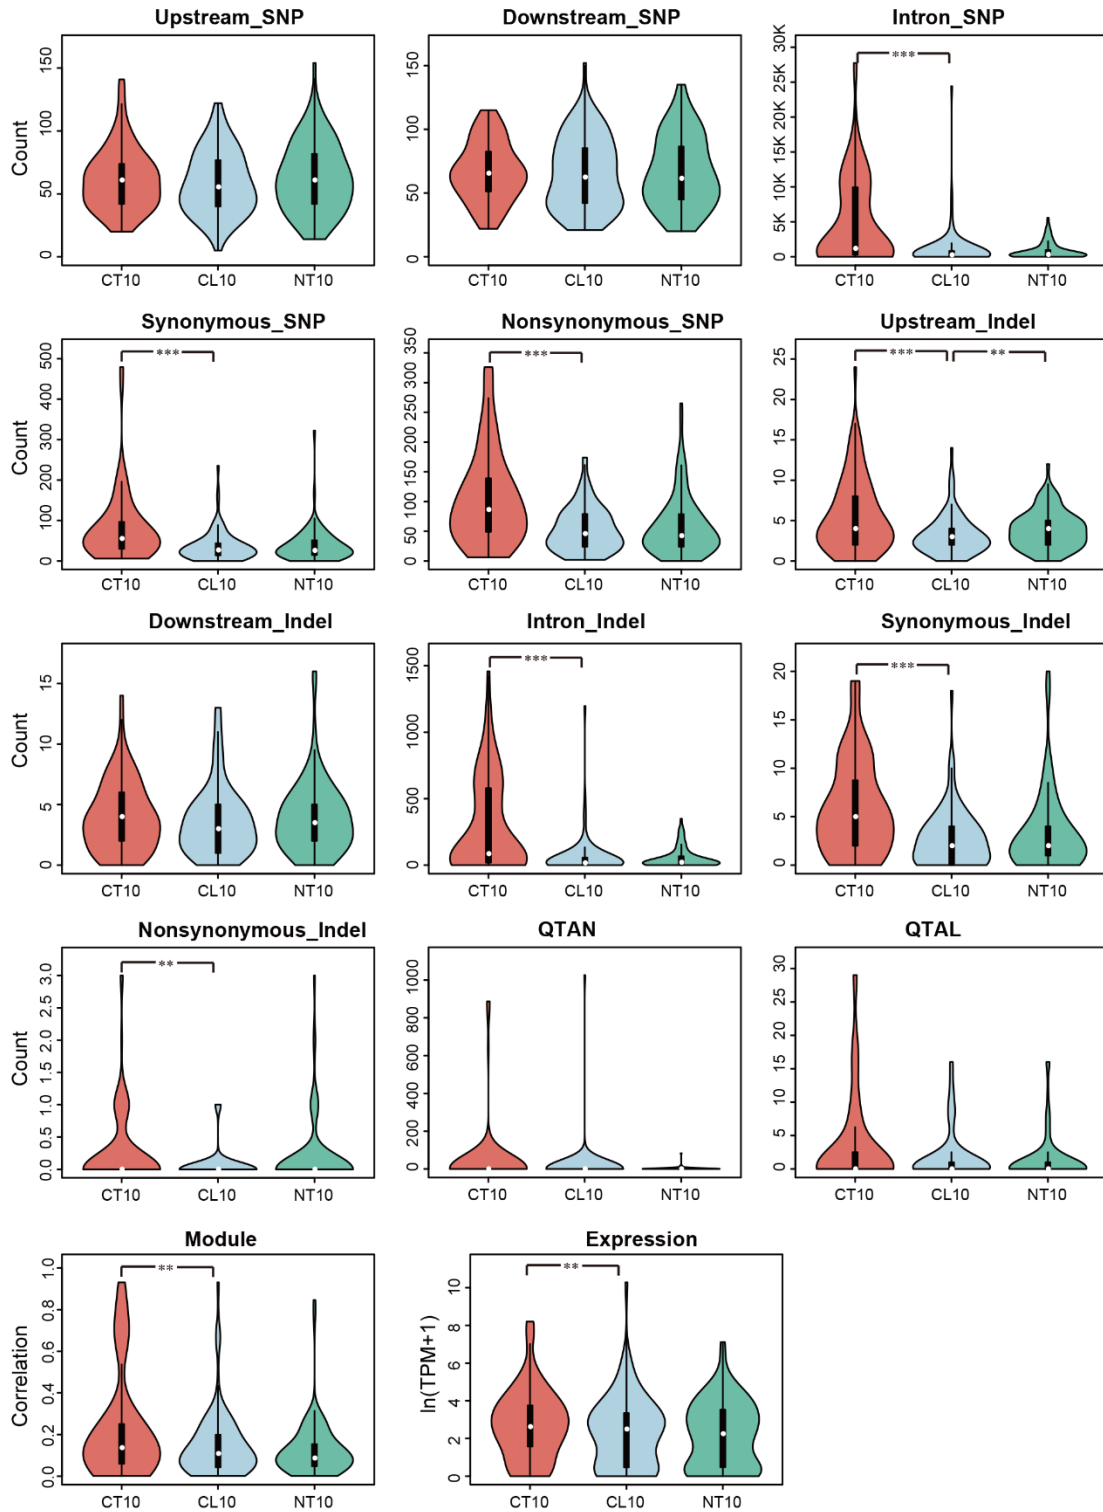

242

243 **Supplementary Figure 16. Discovery of features characteristic of the candidate genes.** Nine of  
 244 the 14 features showed significant differences among three groups (CT10, CL10, and NT10) of  
 245 genes, and six of the 14 features exhibited changing trends in the three groups. The statistical  
 246 significance was calculated by the Mann-Whitney test. \*\*:  $P < 0.05$ , \*\*\*:  $P < 0.01$ ; CT10: top 10  
 247 of credible candidate genes, CL10: last 10 of credible candidate genes, NT10: top 10 of non-credible  
 248 candidate genes.

249





## Supplementary Tables

Supplementary Table 1. Summary of the downloaded pig genome data.

| Project ID  | Samples | Data Size(GB) | Valid samples | Valid Data Size(GB) |
|-------------|---------|---------------|---------------|---------------------|
| PRJEB1683   | 77      | 1,570.40      | 77            | 1,570.40            |
| PRJEB2068   | 1       | 16.82         | 1             | 16.82               |
| PRJEB27654  | 13      | 511.25        | 13            | 511.25              |
| PRJEB9115   | 8       | 113.03        | 7             | 102.65              |
| PRJEB9326   | 18      | 644.60        | 18            | 644.60              |
| PRJEB9922   | 101     | 3,609.48      | 101           | 3,609.48            |
| PRJNA144099 | 1       | 51.33         | 1             | 51.33               |
| PRJNA176189 | 1       | 195.07        | 1             | 195.07              |
| PRJNA176478 | 8       | 231.32        | 7             | 205.41              |
| PRJNA186497 | 49      | 746.81        | 49            | 746.81              |
| PRJNA190683 | 1       | 8.78          | 1             | 8.78                |
| PRJNA213179 | 69      | 4,712.54      | 69            | 4,712.54            |
| PRJNA221763 | 3       | 36.29         | 3             | 36.29               |
| PRJNA231897 | 6       | 143.91        | 6             | 143.91              |
| PRJNA238851 | 5       | 165.81        | 5             | 165.81              |
| PRJNA239399 | 4       | 179.27        | 4             | 179.27              |
| PRJNA240950 | 2       | 23.72         | 2             | 23.72               |
| PRJNA254936 | 14      | 602.39        | 14            | 602.39              |
| PRJNA255085 | 6       | 220.17        | 5             | 178.41              |
| PRJNA260763 | 70      | 2,799.74      | 70            | 2,799.74            |
| PRJNA273907 | 2       | 60.46         | 2             | 60.46               |
| PRJNA281548 | 10      | 249.86        | 9             | 246.31              |
| PRJNA291011 | 1       | 104.05        | 1             | 104.05              |
| PRJNA305081 | 11      | 359.47        | 11            | 359.47              |
| PRJNA305975 | 31      | 481.39        | 29            | 465.37              |
| PRJNA309108 | 9       | 448.45        | 9             | 448.45              |
| PRJNA314580 | 3       | 174.23        | 3             | 174.23              |
| PRJNA320525 | 9       | 311.92        | 9             | 311.92              |
| PRJNA322309 | 8       | 364.08        | 8             | 364.08              |
| PRJNA343658 | 72      | 2,827.48      | 51            | 2,587.59            |
| PRJNA354435 | 1       | 74.80         | 1             | 74.80               |
| PRJNA358108 | 1       | 119.87        | 1             | 119.87              |
| PRJNA369600 | 7       | 217.45        | 7             | 217.45              |
| PRJNA378496 | 71      | 1,639.80      | 60            | 1,549.30            |
| PRJNA393920 | 7       | 127.05        | 7             | 127.05              |
| PRJNA398176 | 24      | 1,559.60      | 24            | 1,559.60            |
| PRJNA41185  | 2       | 65.13         | 2             | 65.13               |
| PRJNA414091 | 97      | 4,750.21      | 96            | 4,677.24            |
| PRJNA418771 | 1       | 104.74        | 1             | 104.74              |
| PRJNA438040 | 1       | 41.77         | 1             | 41.77               |

|             |    |          |    |          |
|-------------|----|----------|----|----------|
| PRJNA482384 | 29 | 1,254.58 | 29 | 1,254.58 |
| PRJNA507853 | 10 | 961.76   | 10 | 961.76   |

286 A total of 32.88 TB of resequencing data was obtained from 42 projects. After filtering, 825 qualified  
 287 individuals were retained for subsequent analyses.

288

289

**Supplementary Table 2. Breeds of the downloaded pig genome data.**

| Continents | Classify            | Breed                | Samples           | Breed              | Samples   |   |
|------------|---------------------|----------------------|-------------------|--------------------|-----------|---|
| Asian      | AND                 | Bamei                | 7                 | Min                | 15        |   |
|            |                     | Baoshan              | 6                 | Neijiang           | 9         |   |
|            |                     | Daweizi              | 1                 | Penzhou            | 3         |   |
|            |                     | Meishan              | 48                | Rongchang          | 12        |   |
|            |                     | Enshi black          | 3                 | Songliao black pig | 2         |   |
|            |                     | Erhualian            | 5                 | Taihu              | 1         |   |
|            |                     | Hetao                | 6                 | Tibetan            | 55        |   |
|            |                     | Jiangquhai           | 4                 | Tongcheng          | 5         |   |
|            |                     | Jinhua               | 12                | Wannan Spotted     | 2         |   |
|            |                     | Korean black pig     | 14                | Wujin              | 3         |   |
|            |                     | Laiwu                | 6                 | Ya'nan             | 3         |   |
|            |                     | Leping Spotted       | 2                 |                    |           |   |
|            |                     | ASD                  | Bamaxiang         | 6                  | MiniLEWE  | 3 |
|            |                     |                      | Diannanxiaocer    | 31                 | Wuzhishan | 8 |
|            | Luchuan             | 6                    | Xiang             | 4                  |           |   |
| ANW        | Wild boar           | 21                   |                   |                    |           |   |
| ASW        | Wild boar           | 19                   |                   |                    |           |   |
| OutGroup   | Bornean Bearded pig | 1                    | Javan warty pig   | 2                  |           |   |
|            | Celebes warty pig   | 1                    | Visayan Warty pig | 8                  |           |   |
| Africa     | OutGroup            | Warthog pig          | 1                 |                    |           |   |
| American   | AMD                 | Creole               | 2                 | Yucatan minipig    | 13        |   |
|            | AMW                 | Wild boar            | 2                 |                    |           |   |
| European   | ECD                 | Duroc                | 78                | Yorkshire          | 40        |   |
|            |                     | Landrace             | 45                |                    |           |   |
|            |                     | Angler Sattleschwein | 2                 | Large Black        | 1         |   |
|            |                     | Berkshire            | 15                | Leicoma            | 1         |   |
|            |                     | British Saddleback   | 2                 | Linderodsvin       | 1         |   |
|            |                     | Bunte Bentheimer     | 1                 | Mangalica          | 5         |   |
|            | END                 | Calabrese            | 1                 | Middle White       | 2         |   |
|            |                     | Casertana            | 2                 | Hampshire          | 5         |   |
|            |                     | Chato Murciano       | 2                 | Nero Siciliano     | 2         |   |
|            |                     | Cinta Senese         | 1                 | Iberian            | 9         |   |
|            |                     | Gloucester Old Spot  | 2                 | Pietrain           | 20        |   |
|            |                     | Goettingen Minipig   | 12                | Tamworth           | 3         |   |
|            | EW                  | Wild boar            | 38                |                    |           |   |
|            | -                   | Hybrid               | Hybrid            | 183                |           |   |

290 The 825 qualified individuals included 29 Asian native breeds, 20 European native breeds, three  
 291 European commercial breeds, two American native breeds, and five other breeds. AND: Asian  
 292 northern domestic, ANW: Asian northern wild, ASD: Asian southern domestic, ASW: Asian  
 293 southern wild, ECD: European commercial domestic, END: European native domestic, EW:  
 294 European wild, AMD: America domestic, AMW: America wild, OutGroup: outgroup.

295

296 **Supplementary Table 3. Summary of annotation of variations in ISwine database.**

| Category             | SNP        | indel     |
|----------------------|------------|-----------|
| intergenic           | 44,927,893 | 6,448,062 |
| upstream             | 1,050,989  | 159,226   |
| UTR5                 | 178,901    | 24,023    |
| exonic               | 1,136,672  | 37,309    |
| intronic             | 31,266,970 | 4,564,006 |
| UTR3                 | 855,901    | 140,529   |
| downstream           | 1,076,563  | 164,397   |
| upstream; downstream | 58,906     | 9,606     |
| UTR5;UTR3            | 5,758      | 884       |
| unannotated          | 1,255,558  | 372,923   |

297 A total of 81,814,111 SNPs and 11,920,965 indels were identified, of which 51.4 million were  
 298 intergenic, 35.8 million were intronic, and 1.17 million were exonic.

299

300 **Supplementary Table 4. Functional gene categories enriched for the genes with QTX coverage**  
 301 **depth >30.**

| Term ID  | Term description                                     | P value (BH) | Involved gene number |
|----------|------------------------------------------------------|--------------|----------------------|
| map04370 | VEGF signaling pathway                               | 1.06E-02**   | 9                    |
| map04668 | TNF signaling pathway                                | 1.75E-02**   | 10                   |
| map04010 | MAPK signaling pathway                               | 1.79E-02**   | 18                   |
| map00970 | Aminoacyl-tRNA biosynthesis                          | 1.71E-02**   | 7                    |
| map05131 | Shigellosis                                          | 8.19E-03***  | 11                   |
| map04933 | AGE-RAGE signaling pathway in diabetic complications | 1.32E-02**   | 11                   |
| map05212 | Pancreatic cancer                                    | 1.76E-02**   | 8                    |
| map05200 | Pathways in cancer                                   | 1.86E-02**   | 25                   |
| map05221 | Acute myeloid leukemia                               | 2.63E-02**   | 7                    |
| map05169 | Epstein-Barr virus infection                         | 2.66E-02**   | 16                   |
| map05218 | Melanoma                                             | 2.74E-02**   | 7                    |
| map05145 | Toxoplasmosis                                        | 3.36E-02**   | 10                   |
| map05219 | Bladder cancer                                       | 3.75E-02**   | 5                    |
| map04621 | NOD-like receptor signaling pathway                  | 4.19E-03***  | 14                   |
| map04915 | Estrogen signaling pathway                           | 9.99E-03***  | 11                   |
| map04723 | Retrograde endocannabinoid signaling                 | 1.63E-02**   | 8                    |
| map04912 | GnRH signaling pathway                               | 1.89E-02**   | 10                   |
| map04728 | Dopaminergic synapse                                 | 2.77E-02**   | 11                   |
| map04920 | Adipocytokine signaling pathway                      | 4.21E-02**   | 8                    |

302 The P values were calculated using a Benjamini & Hochberg -corrected modified hypergeometric

303 test. Only the KEGG-pathways with a  $P$  value  $<0.05$  were considered as significant and listed. \*\*:   
 304  $P < 0.05$ , \*\*\*:  $P < 0.01$ .

305

306 **Supplementary Table 5. The distribution of QTXs in the main categories of the QTX database.**

| Main category          | QTAL  | QTAN  | QTAG |
|------------------------|-------|-------|------|
| Behavioral Traits      | 96    | 156   | 12   |
| Blood Related Traits   | 531   | 4375  | 60   |
| Disease Related Traits | 538   | 487   | 48   |
| Exterior Traits        | 287   | 660   | 25   |
| Fat Related Traits     | 1,441 | 5,148 | 273  |
| Growth Related Traits  | 661   | 808   | 112  |
| Meat Quality Traits    | 1,268 | 1,272 | 605  |
| Muscle Related Traits  | 270   | 75    | 83   |
| Physiochemical Traits  | 86    | 170   | 11   |
| Reproduction Traits    | 679   | 1,584 | 122  |
| Slaughter Traits       | 1,078 | 1,079 | 138  |

307 The QTXs were concentrated mainly in the “Fat Related Traits”, “Blood Related Traits”, and   
 308 “Meat Quality Traits” categories, which was consistent with mainstream research on pigs.

309

310 **Supplementary Table 6. The relative importance of 14 features used in the CNN model.**

| Features            | Relative importance(%) |
|---------------------|------------------------|
| Nonsynonymous_indel | 100.00                 |
| Intron_snp          | 89.02                  |
| Expression          | 80.13                  |
| Module              | 78.01                  |
| QTAL                | 69.26                  |
| Intron_indel        | 41.28                  |
| Synonymous_snp      | 39.81                  |
| Upstream_indel      | 32.97                  |
| Upstream_snp        | 31.68                  |
| Downstream_indel    | 31.49                  |
| Downstream_snp      | 28.73                  |
| Synonymous_indel    | 23.81                  |
| QTAN                | 11.18                  |
| Nonsynonymous_snp   | 7.28                   |

311 Except for the top five features, the relative importance of other features was  $< 50\%$ , and the top   
 312 five features may have played important roles in gene prioritization.

313

314

315

316

317

318

319

320 **Supplementary Table 7. Performances (F1- Measure) comparison of the integrated models**  
 321 **and single omics models.**

| Omics         | LinearSVC | SVC   | MLP   | CNN   |
|---------------|-----------|-------|-------|-------|
| genome        | 0.613     | 0.599 | 0.689 | 0.711 |
| transcriptome | 0.489     | 0.539 | 0.608 | 0.614 |
| literature    | 0.367     | 0.367 | 0.460 | 0.347 |
| multi-omics   | 0.623     | 0.612 | 0.701 | 0.730 |

322 The F1- Measure was used to measure the performance of the model, and the performance of multi-  
 323 omics was better than that of single omics, and the method based on neural network was superior to  
 324 the linear method. LR: Logistic regression; LinearSVC: Linear Support Vector Classifier; MLP:  
 325 Multi-Layer Perceptron; CNN: Convolutional Neural Networks.

326

327 **Supplementary Table 8. The mean values of 14 features in positive and negative samples.**

| Feature             | Positive | Negative | <i>P</i>    |
|---------------------|----------|----------|-------------|
| Upstream_snp        | 57.33    | 60.44    | 3.89E-01    |
| Downstream_snp      | 63.76    | 64.24    | 4.34E-01    |
| Intron_snp          | 1,894.59 | 1,143.98 | 1.06E-14*** |
| Synonymous_snp      | 48.13    | 25.38    | 5.88E-22*** |
| Nonsynonymous_snp   | 71.03    | 46.24    | 7.26E-18*** |
| Upstream_indel      | 3.82     | 3.84     | 9.06E-01    |
| Downstream_indel    | 3.78     | 4.01     | 4.60E-01    |
| Intron_indel        | 121.86   | 76.90    | 2.67E-15*** |
| Synonymous_indel    | 4.15     | 2.69     | 2.47E-14*** |
| Nonsynonymous_indel | 0.11     | 0.12     | 8.43E-01    |
| Module              | 0.25     | 0.13     | 1.02E-22*** |
| Expression          | 3.49     | 1.60     | 1.53E-36*** |
| QTAN                | 5.65     | 0.69     | 1.98E-12*** |
| QTAL                | 1.66     | 0.59     | 2.12E-07*** |

328 Nine of the 14 features showed significant differences between two datasets. \*\*:  $P < 0.05$ , \*\*\*:  $P <$   
 329  $0.01$ .

330

331 **Supplementary Table 9. Nine cases selected for evaluating the gene prioritization model.**

| Trait                  | Candidate genes | credible candidate genes | PMID     |
|------------------------|-----------------|--------------------------|----------|
| Fatty acid composition | 580             | 250                      | 30584983 |
| Meat ultimate pH       | 121             | 60                       | 30815891 |
| Average daily gain     | 94              | 29                       | 30974885 |
| Backfat thickness      | 331             | 108                      | 30974885 |
| Lean percent           | 311             | 130                      | 30974885 |
| Average daily gain     | 279             | 85                       | 31024621 |
| Number of born alive   | 533             | 190                      | 31029102 |
| Backfat thickness      | 132             | 23                       | 28890999 |
| Backfat thickness      | 256             | 83                       | 28196480 |

332 Overall, 50.41%-82.58% of the candidate genes were predicted to be non-credible candidate  
 333 genes, which greatly narrowed the scope of credible candidate genes.

334 **Supplementary Table 10. Number of credible candidate genes identified in nine traits.**

| Group | Trait1 | Trait2 | Trait 3 | Trait 4 | Trait 5 | Trait 6 | Trait 7 | Trait 8 | Trait 9 |
|-------|--------|--------|---------|---------|---------|---------|---------|---------|---------|
| CT10  | 6      | 5      | 6       | 5       | 6       | 4       | 3       | 2       | 5       |
| CL10  | 1      | 2      | 2       | 2       | 3       | 3       | 3       | 4       | 1       |
| NT10  | 1      | 0      | 2       | 2       | 1       | 0       | 2       | 1       | 1       |

335 The number of credible candidate genes in CT10 was much more than CL10 ( $P = 2.36 \times 10^{-3}$ ), and  
 336 the credible candidate gene number in CL10 was more than NT10 ( $P = 9.53 \times 10^{-3}$ ). CT10: top 10  
 337 credible candidate genes; CL10: last 10 credible candidate genes; NT10: top 10 non-credible  
 338 candidate genes.

339

340 **Supplementary Table 11. The proportion of credible candidate genes in different scoring**  
 341 **ranges.**

| Score  | credible candidate gene | Total genes | Ratio (%) |
|--------|-------------------------|-------------|-----------|
| <50    | 10                      | 90          | 11.11     |
| 50,60  | 16                      | 76          | 21.05     |
| 60,90  | 5                       | 18          | 27.78     |
| 90,100 | 42                      | 86          | 48.84     |

342 The proportion of credible candidate genes in different scoring ranges increased (from 21.05 to  
 343 48.84) with the gene score, which suggested that a candidate gene was reliable if its gene score  
 344 was high enough.

345

346 **Supplementary Table 12. The mean values of 14 features in CT10, CL10, and NT10 groups.**

| Feature             | CT10     | CL10     | NT10   | $P$ (CT10_CL10) | $P$ (CL10_NT10) |
|---------------------|----------|----------|--------|-----------------|-----------------|
| Upstream_snp        | 61.70    | 58.88    | 63.18  | 5.24E-01        | 3.38E-01        |
| Downstream_snp      | 66.47    | 65.68    | 66.43  | 6.85E-01        | 8.32E-01        |
| Intron_snp          | 5,048.96 | 1,018.84 | 855.94 | 9.82E-08***     | 2.56E-01        |
| Synonymous_snp      | 81.52    | 36.03    | 37.88  | 7.66E-08***     | 6.23E-01        |
| Nonsynonymous_snp   | 105.87   | 53.39    | 58.46  | 3.69E-07***     | 9.91E-01        |
| Upstream_indel      | 5.62     | 3.19     | 3.89   | 1.00E-04***     | 1.38E-02**      |
| Downstream_indel    | 3.94     | 3.62     | 3.84   | 3.49E-01        | 4.00E-01        |
| Intron_indel        | 293.22   | 58.22    | 53.11  | 5.01E-08***     | 1.87E-01        |
| Synonymous_indel    | 5.90     | 2.70     | 3.23   | 4.19E-07***     | 6.29E-01        |
| Nonsynonymous_indel | 0.24     | 0.07     | 0.17   | 1.28E-02**      | 1.88E-01        |
| Module              | 0.23     | 0.15     | 0.13   | 4.04E-02**      | 2.91E-01        |
| Expression          | 2.73     | 2.29     | 2.15   | 4.47E-02**      | 3.89E-01        |
| QTAN                | 40.68    | 13.73    | 1.88   | 7.09E-02        | 1.04E-01        |
| QTAL                | 3.39     | 1.84     | 1.34   | 3.19E-01        | 6.99E-02        |

347 Nine of the 14 features showed significant differences among three groups (CT10, CL10, and  
 348 NT10) of genes, and six of the 14 features exhibited changing trends in the three groups. \*\*:  $P <$   
 349 0.05, \*\*\*:  $P < 0.01$ ; CT10: top 10 credible candidate genes; CL10: last 10 credible candidate  
 350 genes; NT10: top 10 non-credible candidate genes.

351

352

353

354 **Supplementary Table 13. Statistics of the distance from credible candidate genes to the GWAS**  
 355 **top signal.**

| Distance(KB) | credible candidate genes | Total genes | Ratio(Range) | Ratio(credible candidate genes) |
|--------------|--------------------------|-------------|--------------|---------------------------------|
| 0-200        | 25                       | 71          | 34.25        | 35.21                           |
| 200-400      | 15                       | 57          | 20.55        | 26.32                           |
| 400-600      | 11                       | 48          | 15.07        | 22.92                           |
| 600-800      | 7                        | 44          | 9.59         | 15.91                           |
| 800-1000     | 15                       | 50          | 20.55        | 30.00                           |

356 Candidate genes that were close to a GWAS peak signal had a higher proportion of credible  
 357 candidate genes than those far away from the peak, but the proportion of credible candidate genes  
 358 at near and far distances was similar, which indicated that distal regulation should be considered in  
 359 the identification of credible candidate genes.

360

361 **Supplementary Table 14. Comparison of swine variation databases.**

| Database | Individuals | Number of Variations | Individual genotype | Assembly Version |
|----------|-------------|----------------------|---------------------|------------------|
| ISwine   | 825         | 93,735,076           | Available           | 11.1             |
| pigVar   | 280         | 71,819,600           | Available           | 10.2             |
| dbSNP    | NA          | 63,881,778           | NA                  | 11.1             |
| GVM      | 409         | 76,797,395           | NA                  | 10.2             |

362 Compared with existing swine databases, such as pigVar, dbSNP from NCBI (updates have  
 363 stopped), and the Genome Variation Map (GCM), ISwine has the largest number of variations and  
 364 number of resequencing individuals.

365

366

367

368

369

370

371

372

373

374

375

376

377

378

379

380

381

382

383

384

385



386 **Supplementary Note 1: Database interface and general functions**

387 ISwine has provided a user-friendly interface for users to browse, search, visualize,  
388 download, and analyze the structured omics data. A top navigation bar was designed to  
389 assist users to access the above-mentioned database ("Integration", "Variation",  
390 "Expression", and "QTX") and to use the functions of the "BLAST", "Primer",  
391 "JBrowser", and "Prioritize" tools. To facilitate the acquisition of information for users  
392 from the database, we designed various search modes based on the characteristics of  
393 different data, such as key field search mode, region search mode, and associated  
394 information search mode. The users can obtain their interested information flexibly by  
395 choosing an applicable mode.

396 In addition to search engines, we also offer different functions for different databases.  
397 These functions mainly emphasize the interaction and visualization of results, so users  
398 can get information of interest intuitively. For example, in the variation database, the  
399 user can construct one or more populations by sample attributes or sample individuals  
400 through the population design module (**Figure 3a**), so they can observe mutations in  
401 different populations easily. We also visualized the variations and related genes in the  
402 genome (**Figure 3b**), and the user can choose a SNP/indel quickly by clicking the site  
403 directly. Finally, users can obtain the genotypes of all individuals at their interested sites  
404 through the variation details page (**Figure 3b**). In addition, all results in the variation  
405 database are not only interactive online, but also downloadable, so users can select their  
406 favorite tools to filter and to analyze the data.

407 In the expression database, we display the gene expression level or fold change of  
408 differential expressed genes with heatmap (**Figure 3c**), so users can observe the  
409 expression characteristics among different samples. We also designed filter functions  
410 for users to adjust the number of samples or genes displayed in the expression matrix.  
411 In the transcriptome study, the tissue information of the sample has received much  
412 attention. We designed a gene expression profile module (**Figure 3d**) for users to  
413 observe gene expression patterns in different tissues. The gene expression profile  
414 module displays one or more genes with heatmaps, boxplots, and line graphs, and the  
415 user can adjust the number of genes displayed in the image by clicking a convenient

416 label.

417 In the QTX database, a physical map (**Figure 3e**) was constructed for users to select  
418 their QTXs in a convenient and intuitive way, and the positional relationship of QTX  
419 on the genome was reflected more intuitively. In addition, due to the low quality of  
420 some QTALs, we also designed a QTX rating system (**Figure 3f**) so the user can judge  
421 the authenticity of the QTAL more correctly by referring to the evaluations of other  
422 users.

423 The functions designed for the integration database mainly focus on data aggregation  
424 and integration. First of all, we provide an advanced search engine (**Figure 3a**) so that  
425 users can easily use the information of the basic database to filter the genes of interest.  
426 And secondly, we designed a gene prioritization model (**Figure 3c**) so users can easily  
427 use this system to prioritize the genes of interest by inputting a gene list or region list.  
428 The system will return a sorted gene table, and the user can further access the  
429 information on gene details (**Figure 3b**) that are aggregated by database to finally  
430 determine the credible candidate genes and then to mark and to export them from the  
431 gene table. For the gene details page, we added some simple and practical functions,  
432 such as copying of sequences, display of structures, and more functions are called  
433 directly from the basic database ("Variation", "Expression", and "QTX").

434 Finally, we provide users with some downstream tools to analyze credible candidate  
435 genes, such as Primer (**Figure 3k**) for primer designing, BLAST (**Figure 3l**) for  
436 sequence targeting, and JBrowser (**Figure 3k**) for visualizing genetic components.

437

438 **Supplementary Method 1: Evaluation Metrics.** The averages of model accuracy,  
439 precision, recall, and F1 scores were calculated to evaluate the model's performance by  
440 using a 4-fold cross-validation method. The model accuracy was defined as the ratio  
441 between the number of samples identified correctly and total number of samples in the  
442 training set. The model precision was defined as the ratio between the number of  
443 positive samples identified correctly and total number of positive samples in the  
444 training set. The model recall was defined as the ratio between the number of genes  
445 identified correctly and total number of identified genes, and the model F1 score was

446 the harmonic mean of precision and recall:

447

$$448 \quad \textit{Accuracy} = \frac{\textit{True positive samples} + \textit{True negative samples}}{\textit{Total samples in training set}}$$

449

$$450 \quad \textit{Recall} = \frac{\textit{True positive samples}}{\textit{Total positive samples in training set}}$$

451

$$452 \quad \textit{Precision} = \frac{\textit{True positive samples}}{\textit{Total positive samples predicted}}$$

453

$$454 \quad \textit{F1} = \frac{2 * \textit{Precision} * \textit{Recall}}{\textit{Precision} + \textit{Recall}}$$

455

456
