# Supplementary material for: A gene prioritization method based on a swine multi-omics knowledgebase and a deep learning model
Source: PubMed Central journal article supplement (PMC7483748; doi:10.1038/s42003-020-01233-4), 2020-09-10
Supplement: 42003_2020_1233_MOESM2_ESM.pdf [file 42003_2020_1233_MOESM2_ESM.pdf]

## **Description of Additional Supplementary Files**

**Supplementary Data 1. Summary and mapping statistics of genome data in ISwine database.**

**Supplementary Data 2. Summary of the downloaded pig transcriptome data.** A total of 20.0 TB of sequencing data, 263 projects, and 3,526 samples were downloaded and analyzed.

**Supplementary Data 3. Summary and mapping statistics of transcriptome data in ISwine database.**

**Supplementary Data 4. Tissue classification and statistics of pig transcriptome data in ISwine database.** A total of 3,282 samples were classified into seven main categories and 95 subcategories based on tissue classification and their relative position in the swine's body.

**Supplementary Data 5. The list of QTXs related literatures in ISwine database.**

**Supplementary Data 6. The information of the trimmed QTALs.**

**Supplementary Data 7. The statistics of QTXs coverage depth for all genes in the swine genome.**

**Supplementary Data 8. Trait classification and statistics of pig QTX data in ISwine database.** The relevant traits of 24,238 QTXs in pig were divided into 11 major categories and 89 subcategories.

**Supplementary Data 9. The Training Set used in this study.**

**Supplementary Data 10. The details of positive samples used in this study.**

**Supplementary Data 11. References to credible candidate genes in different trait cases.** The green, pink, and gray backgrounds represent the candidate gene is reported to be credible candidate in the case literature, in other literatures, and non-reported, respectively.
